# Supplementary material for: Genome Analysis of the First Extensively Drug-Resistant (XDR) Mycobacterium tuberculosis in Malaysia Provides Insights into the Genetic Basis of Its Biology and Drug Resistance
Source: PubMed Central journal article supplement (PMC4481353; doi:10.1371/journal.pone.0131694), 2015-06-25
Supplement: pone.0131694.s002.pdf [file pone.0131694.s002.pdf]

|                    |                                                         |
|--------------------|---------------------------------------------------------|
| 43-16836           | CACGCGCTAAGGGGTGTTGTAAACAGGTCGGTATACTCAGCACT <b>ATG</b> |
| C                  | CACGCGCTAAGGGGTGTTGTAAACAGGTCGGTATACTCAGCACT <b>ATT</b> |
| 98-R604_INH-RIF-EM | CACGCGCTAAGGGGTGTTGTAAACAGGTCGGTATACTCAGCACT <b>ATG</b> |
| bovis              | CACGCGCTAAGGGGTGTTGTAAACAGGTCGGTATACTCAGCACT <b>ATG</b> |
| CDC1551            | CACGCGCTAAGGGGTGTTGTAAACAGGTCGGTATACTCAGCACT <b>ATG</b> |
| EAS054             | CACGCGCTAAGGGGTGTTGTAAACAGGTCGGTATACTCAGCACT <b>ATG</b> |
| F11                | CACGCGCTAAGGGGTGTTGTAAACAGGTCGGTATACTCAGCACT <b>ATG</b> |
| H37Rv              | CACGCGCTAAGGGGTGTTGTAAACAGGTCGGTATACTCAGCACT <b>ATG</b> |
| Harlem             | CACGCGCTAAGGGGTGTTGTAAACAGGTCGGTATACTCAGCACT <b>ATG</b> |
| INS_XDR            | CACGCGCTAAGGGGTGTTGTAAACAGGTCGGTATACTCAGCACT <b>ATG</b> |
| KZN605             | CACGCGCTAAGGGGTGTTGTAAACAGGTCGGTATACTCAGCACT <b>ATG</b> |
| KZN_R506           | CACGCGCTAAGGGGTGTTGTAAACAGGTCGGTATACTCAGCACT <b>ATG</b> |
| KZN_V2475          | CACGCGCTAAGGGGTGTTGTAAACAGGTCGGTATACTCAGCACT <b>ATG</b> |
| KZN-1435           | CACGCGCTAAGGGGTGTTGTAAACAGGTCGGTATACTCAGCACT <b>ATG</b> |
| KZN-4207           | CACGCGCTAAGGGGTGTTGTAAACAGGTCGGTATACTCAGCACT <b>ATG</b> |
| MAF_CPHL_A         | CACGCGCTAAGGGGTGTTGTAAACAGGTCGGTATACTCAGCACT <b>ATG</b> |
| GM041182           | CACGCGCTAAGGGGTGTTGTAAACAGGTCGGTATACTCAGCACT <b>ATG</b> |
| MAF_K85            | CACGCGCTAAGGGGTGTTGTAAACAGGTCGGTATACTCAGCACT <b>ATG</b> |
| MTB_T17            | CACGCGCTAAGGGGTGTTGTAAACAGGTCGGTATACTCAGCACT <b>ATG</b> |
| MTB_T46            | CACGCGCTAAGGGGTGTTGTAAACAGGTCGGTATACTCAGCACT <b>ATG</b> |
| MTB_T92            | CACGCGCTAAGGGGTGTTGTAAACAGGTCGGTATACTCAGCACT <b>ATG</b> |
| OSDD271            | CACGCGCTAAGGGGTGTTGTAAACAGGTCGGTATACTCAGCACT <b>ATG</b> |
| OSDD493            | CACGCGCTAAGGGGTGTTGTAAACAGGTCGGTATACTCAGCACT <b>ATG</b> |
| PanR0201           | CACGCGCTAAGGGGTGTTGTAAACAGGTCGGTATACTCAGCACT <b>ATG</b> |
| PanR0610           | CACGCGCTAAGGGGTGTTGTAAACAGGTCGGTATACTCAGCACT <b>ATG</b> |
| PanR0902           | CACGCGCTAAGGGGTGTTGTAAACAGGTCGGTATACTCAGCACT <b>ATG</b> |
| PanR0906           | CACGCGCTAAGGGGTGTTGTAAACAGGTCGGTATACTCAGCACT <b>ATG</b> |
| CTRI-2             | CACGCGCTAAGGGGTGTTGTAAACAGGTCGGTATACTCAGCACT <b>ATG</b> |
| PanR0411           | CACGCGCTAAGGGGTGTTGTAAACAAGTCGGTATACTCAGCACT <b>ATG</b> |
| 210                | CACGCGCTAAGGGGTGTTGTAAACAGGTCGGTATACTCAGTACT <b>ATG</b> |
| CTRI-4             | CACGCGCTAAGGGGTGTTGTAAACAGGTCGGTATACTCAGTACT <b>ATG</b> |
| FJ05194            | CACGCGCTAAGGGGTGTTGTAAACAGGTCGGTATACTCAGTACT <b>ATG</b> |
| G-12-005           | CACGCGCTAAGGGGTGTTGTAAACAGGTCGGTATACTCAGTACT <b>ATG</b> |
| HN878              | CACGCGCTAAGGGGTGTTGTAAACAGGTCGGTATACTCAGTACT <b>ATG</b> |
| NZXDR1             | CACGCGCTAAGGGGTGTTGTAAACAGGTCGGTATACTCAGTACT <b>ATG</b> |
| R1207              | CACGCGCTAAGGGGTGTTGTAAACAGGTCGGTATACTCAGTACT <b>ATG</b> |
| UM_1072388579      | CACGCGCTAAGGGGTGTTGTAAACAGGTCGGTATACTCAGTACT <b>ATG</b> |
| WX1                | CACGCGCTAAGGGGTGTTGTAAACAGGTCGGTATACTCAGTACT <b>ATG</b> |
| X122               | CACGCGCTAAGGGGTGTTGTAAACAGGTCGGTATACTCAGTACT <b>ATG</b> |
| OM-V02_005         | CACGCGCTAAGGGGTGTTGTAAACAGGTCGGTATACTCAGTACT <b>ATG</b> |
| W-148              | CACGCGCTAAGGGGTGTTGTAAACAGGTCGGTATACTCAGTACT <b>ATG</b> |
| WX3                | CACGCGCTAAGGGGTGTTGTAAACAGGTCGGTATACTCAGTACT <b>ATG</b> |
| XDR1219            | CACGCGCTAAGGGGTGTTGTAAACAGGTCGGTATACTCAGTACT <b>ATG</b> |
| XDR1221            | CACGCGCTAAGGGGTGTTGTAAACAGGTCGGTATACTCAGTACT <b>ATG</b> |
| PR05               | CACGCGCTAAGGGGTGTTGTAAACAGGTCGGTATACTCAGCACT <b>ATG</b> |
| OSDD515            | CACGCGCTAAGGGGTGTTGTAAACAGGTCGGTATACTCAGCACT <b>ATG</b> |
| OSDD105            | CACGCGCTAAGGGGTGTTGTAAACAGGTCGGTATACTCAGCACT <b>ATG</b> |
| GuangZ0019         | CACGCGCTAAGGGGTGTTGTAAACAGGTCGGTATACTCAGCACT <b>ATG</b> |
| C2                 | CACGCGCTAAGGGGTGTTGTAAACAGGTCGGTATACTCAGCACT <b>ATG</b> |
| CAS_NITR204        | CACGCGCTAAGGGGTGTTGTAAACAGGTCGGTATACTCAGCACT <b>ATG</b> |

\*\*\*\*\*
