# Supplementary material for: Genome Analysis of the First Extensively Drug-Resistant (XDR) Mycobacterium tuberculosis in Malaysia Provides Insights into the Genetic Basis of Its Biology and Drug Resistance
Source: PubMed Central journal article supplement (PMC4481353; doi:10.1371/journal.pone.0131694), 2015-06-25
Supplement: pone.0131694.s003.pdf [file pone.0131694.s003.pdf]

| No | Species <sup>1</sup> | Strain (GenBank accession number) | Type <sup>2</sup> | Genotype family <sup>3</sup>               | Geographic location               | Reference |
|----|----------------------|-----------------------------------|-------------------|--------------------------------------------|-----------------------------------|-----------|
| 1  | MTB                  | H37Rv (NC_000962)                 | DS                | Euro-American lineage 4 strain, T          |                                   | [1]       |
| 2  | MTB                  | F11 (CP000717.1)                  | DS                | Euro-American lineage 4 strain, LAM3       | Western Cape of South Africa      | [2]       |
| 3  | MTB                  | PRO5 (AOMG00000000)               | DS                | Indo-Oceanic lineage 1 strain              | Malaysia                          | [3]       |
| 4  | MTB                  | 43-16836 (ATNF00000000)           | DS                | Indo-Oceanic lineage 1 strain              | Thailand                          | [4]       |
| 5  | MTB                  | CTRI-2 (CP002992)                 | DS                | Euro-American lineage 4 strain, LAM9       | Vladimir, Russia (Central region) | [5]       |
| 6  | MTB                  | C2 ( JHAD00000000)                | DS                | Euro-American lineage 4 strain, LAM family | Kaohsiung, Taiwan                 | [6]       |
| 7  | MTB                  | KZN_4207 (CP001662)               | DS                | Euro-American lineage 4 strain, LAM4       | KwaZulu-Natal, South Africa       | [7]       |
| 8  | MTB                  | 98-R604 INH-RIF-EM (ABVM00000000) | DS                | Euro-American lineage 4 strain, LAM family | Not reported                      | -         |
| 9  | MTB                  | C (AAKR01000000)                  | DS                | Euro-American lineage 4 strain, X          | New York, USA                     | [8]       |
| 10 | MTB                  | 210 (ADAB00000000)                | DS                | East-Asian lineage 2 strain, Beijing       | Los Angeles, USA                  |           |
| 11 | MTB                  | HN878 (ADNF00000000)              | DS                | East-Asian lineage 2 strain, Beijing       | USA                               | [9]       |
| 12 | MTB                  | CDC1551 (AE000516.2)              | DS                | Euro-American lineage 4 strain, X3         | USA                               |           |
| 13 | MTB                  | G-12-005 (JHUF00000000)           | MDR               | East-Asian lineage 2 strain, Beijing       | Georgia                           | [10]      |
| 14 | MTB                  | OSDD271 (AQQC00000000)            | MDR               | Indo-Oceanic lineage 1 strain, EAI         | India                             | [11]      |
| 15 | MTB                  | OSDD515 (AUXC01000000)            | MDR               | Euro-American lineage 4 strain, Uganda 1   | India                             | [12]      |
| 16 | MTB                  | OSDD105 (AUXD00000000)            | MDR               | Euro-American lineage 4 strain, T2         | India                             | [13]      |
| 17 | MTB                  | KZN_1435 (CP001658.1 )            | MDR               | Euro-American lineage 4 strain, LAM4       | KwaZulu-Natal, South Africa       | [5]       |
| 18 | MTB                  | KZN_V2475 (ACVT00000000)          | MDR               | Euro-American lineage 4 strain, LAM4       | KwaZulu-Natal, South Africa       | [7]       |
| 19 | MTB                  | R1207 (ADNH00000000.1)            | MDR               | East-Asian lineage 2 strain, Beijing       | Western Cape of South Africa      | [9]       |
| 20 | MTB                  | OM-V02_005 (BARZ00000000)         | MDR               | East-Asian lineage 2 strain, Beijing       | Japan                             | [14]      |
| 21 | MTB                  | W-148 (ACSX00000000.1)            | MDR               | East-Asian lineage 2 strain, Beijing       | Rusia                             | -         |
| 22 | MTB                  | WX1 (AJGM01000000)                | MDR               | East-Asian lineage 2 strain, Beijing       | WuXi,China                        | [15]      |
| 23 | MTB                  | WX3 (AJGL01000000)                | MDR               | East-Asian lineage 2 strain, Beijing       | WuXi,China                        | [15]      |
| 24 | MTB                  | Harlem (AASN00000000)             | MDR               | Euro-American lineage 4 strain, Haarlem    | The Netherlands                   | -         |
| 25 | MTB                  | PanR0902 (ATSK00000000)           | MDR               | Euro-American lineage 4 strain, Haarlem    | Panama                            | [16]      |
| 26 | MTB                  | PanR0411 ( ATDY00000000)          | MDR               | Euro-American lineage 4 strain, LAM9-c1    | Panama                            | [16]      |

<sup>1</sup>MTB: *Mycobacterium tuberculosis*

<sup>2</sup>DS: drug susceptible; MDR: multidrug resistant; XDR: extensively-drug resistant

<sup>3</sup>LAM: Latin American Mediterranean; EAI: East African Indian

| No | Species <sup>1</sup> | Strain (GenBank accession number) | Type <sup>2</sup> | Genotype family <sup>3</sup>                      | Geographic location          | Reference  |
|----|----------------------|-----------------------------------|-------------------|---------------------------------------------------|------------------------------|------------|
| 27 | MTB                  | PanR0906 (ATSN00000000)           | MDR               | Euro-American lineage 4 strain, LAM-c3            | Panama                       | [16]       |
| 28 | MTB                  | PanR0610 (ATSA00000000)           | MDR               | Euro-American lineage 4 strain, LAM-c2            | Panama                       | [16]       |
| 29 | MTB                  | PanR0201 (ANZG00000000)           | MDR               | Euro-American lineage 4 strain, LAM-c2            | Panama                       | [16]       |
| 30 | MTB                  | UM 1072388579 (AMXW00000000)      | XDR               | East Asia lineage 2 strain, non-Beijing           | Kuala Lumpur, Malaysia       | This study |
| 31 | MTB                  | INS_XDR (JANH00000000)            | XDR               | Euro-American lineage 4 strain, LAM family        | Peru                         | [17]       |
| 32 | MTB                  | NZXDR1 (CCBK00000000)             | XDR               | East Asia lineage 2 strain                        | New Zealand                  | [18]       |
| 33 | MTB                  | KZN_605 (ABGN00000000)            | XDR               | Euro-American lineage 4 strain, LAM4              | KwaZulu-Natal, South Africa  | -          |
| 34 | MTB                  | OSDD493 (AVQJ00000000)            | XDR               | Euro-American lineage 4 strain, Ural              | India                        | [19]       |
| 35 | MTB                  | CTRI-4 (AIE01000000)              | XDR               | East-Asian lineage 2 strain, Beijing-like         | Tomsk, Russia (Siberia)      | [5]        |
| 36 | MTB                  | KZN_R506 (ACVU00000000)           | XDR               | Euro-American lineage 4 strain, LAM4              | KwaZulu-Natal, South Africa  | [7]        |
| 37 | MTB                  | GuangZ0019 (ANFI01000001)         | XDR               | Euro-American lineage 4 strain, MANU2             | Guangdong, China             | [20]       |
| 38 | MTB                  | FJ05194 (ANBL01000000)            | XDR               | East Asia lineage 2 strain, non-Beijing           | Fujian, China                | [20]       |
| 39 | MTB                  | XDR1219 (AJGO00000000.1)          | XDR               | East-Asian lineage 2 strain, Beijing              | Shanghai, China              | [15]       |
| 40 | MTB                  | XDR1221 (AJGN01000000)            | XDR               | East-Asian lineage 2 strain, Beijing              | Shanghai, China              | [15]       |
| 41 | MTB                  | PanR0411 (ATDY00000000)           | MDR               | Euro-American lineage 4 strain, LAM-c1            | Panama                       | [16]       |
| 42 | MTB                  | X122 (ADNG00000000.1)             | Pre-XDR           | East-Asian lineage 2 strain, Beijing              | Western Cape of South Africa | [9]        |
| 43 | MTB                  | MTB T92                           | Unknown           | Indo-Oceanic lineage 1 strain                     | The Philippines              | [21]       |
| 44 | MTB                  | MTB T17                           | Unknown           | Indo-Oceanic lineage 1 strain                     | The Philippines              | [21]       |
| 45 | MTB                  | EAS054                            | Unknown           | Indo-Oceanic lineage 1 strain                     | India                        | [22]       |
| 46 | MTB                  | MTB T46                           | Unknown           | Indo-Oceanic lineage 1 strain                     | The Philippines              | [22]       |
| 47 | MTB                  | CAS/NITR204                       | Unknown           | East African-Indian lineage 3                     | Chennai, India               | [22]       |
| 48 | MAF                  | MAF CPHL_A                        | Unknown           | Mycobacterium africanum (West Africa 1) lineage 5 | California, USA              | [22]       |
| 49 | MAF                  | MAF GM041182 (FR878060)           | Unknown           | Mycobacterium africanum (West Africa 2) lineage 6 | The Gambia                   | [22]       |
| 50 | MAF                  | MAF K85                           | Unknown           | Mycobacterium africanum (West Africa 2) lineage 6 | Netherlands                  | [22]       |
| 51 | MBV                  | BCG str. ATCC 35743               | -                 | -                                                 | -                            | -          |

<sup>1</sup>MTB: *Mycobacterium tuberculosis*; MAF: *Mycobacterium africanum*

<sup>2</sup>DS: drug susceptible; MDR: multidrug resistant; XDR: extensively-drug resistant

<sup>3</sup>LAM: Latin American Mediterranean; EAI: East African Indian

## Supplementary reference

1. Cole ST, Brosch R, Parkhill J, Garnier T, Churcher C, Harris D, Gordon SV, Eiglmeier K, Gas S, Barry CE, 3rd *et al*: **Deciphering the biology of *Mycobacterium tuberculosis* from the complete genome sequence.** *Nature* 1998, **393**(6685):537-544.
2. Gagneux S, Small PM: **Global phylogeography of *Mycobacterium tuberculosis* and implications for tuberculosis product development.** *Lancet Infect Dis* 2007, **7**(5):328-337.
3. Ismail A, Teh LK, Ngeow YF, Norazmi MN, Zainul ZF, Tang TH, Najimudin N, Salleh MZ: **Draft Genome Sequence of a Clinical Isolate of *Mycobacterium tuberculosis* Strain PR05.** *Genome Announc* 2013, **1**(3).
4. Viratyosin W, Kulawonganunchai S, Smittipat N, Juthayothin T, Penpassakarn P, Pasomsab E, Chantratita W, Chaiprasert A, Palittapongarnpim P: **Draft Genome Sequence of the *Mycobacterium tuberculosis* Strain 43-16836, Belonging to the Indo-Oceanic Lineage, Isolated From Tuberculous Meningitis in Thailand.** *Genome Announc* 2013, **1**(5).
5. Iilina EN, Shitikov EA, Ikryannikova LN, Alekseev DG, Kamashev DE, Malakhova MV, Parfenova TV, Afanas'ev MV, Ischenko DS, Bazaleev NA *et al*: **Comparative genomic analysis of *Mycobacterium tuberculosis* drug resistant strains from Russia.** *PLoS One* 2013, **8**(2):e56577.
6. Liao YC, Chen YY, Lin HH, Chang JR, Su IJ, Huang TS, Dou HY: **Draft Genome Sequence of the *Mycobacterium tuberculosis* Clinical Isolate C2, Belonging to the Latin American-Mediterranean Family.** *Genome Announc* 2014, **2**(3).
7. Ioerger TR, Koo S, No EG, Chen X, Larsen MH, Jacobs WR, Jr., Pillay M, Sturm AW, Sacchettini JC: **Genome analysis of multi- and extensively-drug-resistant tuberculosis from KwaZulu-Natal, South Africa.** *PLoS One* 2009, **4**(11):e7778.
8. Friedman CR, Quinn GC, Kreiswirth BN, Perlman DC, Salomon N, Schluger N, Lutfey M, Berger J, Poltoratskaia N, Riley LW: **Widespread dissemination of a drug-susceptible strain of *Mycobacterium tuberculosis*.** *J Infect Dis* 1997, **176**(2):478-484.
9. Ioerger TR, Feng Y, Chen X, Dobos KM, Victor TC, Streicher EM, Warren RM, Gey van Pittius NC, Van Helden PD, Sacchettini JC: **The non-clonality of drug resistance in Beijing-genotype isolates of *Mycobacterium tuberculosis* from the Western Cape of South Africa.** *BMC Genomics* 2010, **11**:670.
10. Berland JL, de Carvalho FM, de Almeida LG, Bablshvili N, Gauthier M, Paranhos-Baccala G, de Vasconcelos AT: **Draft Genome Sequence of *Mycobacterium tuberculosis* Clinical Strain G-12-005.** *Genome Announc* 2014, **2**(3).

11. Karuthedath Vellarikkal S, Patowary A, Singh M, Periwal V, Singh AV, Singh PK, Garg P, Mohan Katoch V, Katoch K, Jangir PK *et al*: **Draft Genome Sequence of a Clinical Isolate of Multidrug-Resistant *Mycobacterium tuberculosis* East African Indian Strain OSDD271.** *Genome Announc* 2013, **1**(4).
12. Vellarikkal SK, Singh AV, Singh PK, Garg P, Katoch VM, Katoch K, Chauhan DS, Sivasubbu S, Scaria V: **Draft Genome Sequence of Multidrug-Resistant *Mycobacterium tuberculosis* Clinical Isolate OSDD515, Belonging to the Uganda I Genotype.** *Genome Announc* 2013, **1**(6).
13. Vellarikkal SK, Singh AV, Singh PK, Garg P, Katoch VM, Katoch K, Chauhan DS, Sivasubbu S, Scaria V: **Draft Genome Sequence of a Multidrug-Resistant Clinical Isolate of *Mycobacterium tuberculosis* Belonging to a Novel Spoligotype.** *Genome Announc* 2013, **1**(6).
14. Tateishi Y, Tamaru A, Ogura Y, Niki M, Wada T, Yamamoto T, Hirata K, Hayashi T, Matsumoto S: **Whole-Genome Sequence of the Potentially Hypertransmissible Multidrug-Resistant *Mycobacterium tuberculosis* Beijing Strain OM-V02\_005.** *Genome Announc* 2013, **1**(4).
15. Wu W, Zheng H, Zhang L, Wen Z, Zhang S, Pei H, Yu G, Zhu Y, Cui Z, Hu Z *et al*: **A genome-wide analysis of multidrug-resistant and extensively drug-resistant strains of *Mycobacterium tuberculosis* Beijing genotype.** *Mol Genet Genomics* 2013, **288**(9):425-436.
16. Lanzas F, Karakousis PC, Sacchetti JC, Ioerger TR: **Multidrug-resistant tuberculosis in panama is driven by clonal expansion of a multidrug-resistant *Mycobacterium tuberculosis* strain related to the KZN extensively drug-resistant *M. tuberculosis* strain from South Africa.** *J Clin Microbiol* 2013, **51**(10):3277-3285.
17. Guio H, Tarazona D, Galarza M, Borda V, Curitomay R: **Genome analysis of 17 extensively drug-resistant strains reveals new potential mutations for resistance.** *Genome Announc* 2014, **2**(4).
18. O'Toole RF, Johari BM, Mac Aogain M, Rogers TR, Bower JE, Basu I, Freeman JT: **Draft Genome Sequence of the First Isolate of Extensively Drug-Resistant *Mycobacterium tuberculosis* in New Zealand.** *Genome Announc* 2014, **2**(3).
19. Karuthedath Vellarikkal S, Vir Singh A, Kumar Singh P, Garg P, Mohan Katoch V, Katoch K, Chauhan DS, Scaria V, Sivasubbu S: **Draft Genome Sequence of an Extensively Drug-Resistant *Mycobacterium tuberculosis* Clinical Isolate of the Ural Strain OSDD493.** *Genome Announc* 2013, **1**(6).
20. Lin N, Liu Z, Zhou J, Wang S, Fleming J: **Draft Genome Sequences of Two Super-XDR Isolates of *M. tuberculosis* from China.** *FEMS Microbiol Lett* 2013.
21. Comas I, Chakravarti J, Small PM, Galagan J, Niemann S, Kremer K, Ernst JD, Gagneux S: **Human T cell epitopes of *Mycobacterium tuberculosis* are evolutionarily hyperconserved.** *Nat Genet* 2010, **42**(6):498-503.
22. Broad Institute website. [[www.broadinstitute.org/](http://www.broadinstitute.org/)]
